# Supplementary material for: High spatial resolution in situ U–Pb dating using laser ablation multiple ion counting inductively coupled plasma mass spectrometry (LA-MIC-ICP-MS)
Source: Royal Society of Chemistry journal article supplement (doi:10.1039/c6ja00387g), 2017-01-01
Supplement: c6ja00387g3.pdf [file c6ja00387g3.pdf]

**Table 1s Influence of the repetition rate on the fractionation for  $^{206}\text{Pb}/^{238}\text{U}$**

| <b>Repetition rate<sup>a</sup> (Hz)</b>                     | 3      | 4      | 5      | 6      | 7      | 8      | 9      | 10     |
|-------------------------------------------------------------|--------|--------|--------|--------|--------|--------|--------|--------|
| <b>Ablated depth<sup>b</sup> (<math>\mu\text{m}</math>)</b> | 4.0    | 5.3    | 6.7    | 8.0    | 9.4    | 10.7   | 12.0   | 13.4   |
| <b><math>^{206}\text{Pb}</math><sup>c</sup> (cps)</b>       | 376533 | 470945 | 539043 | 606440 | 670953 | 717353 | 768790 | 805350 |
| <b>Fractionation index<sup>d</sup></b>                      | 1.23   | 1.3    | 1.35   | 1.37   | 1.43   | 1.46   | 1.51   | 1.57   |

<sup>a</sup> At fluence of 4 J/cm<sup>2</sup> (40% of transmission for laser energy of 6 mJ)

<sup>b</sup> Calculated simply by number of pulses multiply by 120 nm per pulse

<sup>c</sup> Sum of counts per second for  $^{206}\text{Pb}$  signal intensities of 80 cycles

<sup>d</sup> Index of fractionation is calculated by the ratio of mean value of  $^{206}\text{Pb}/^{238}\text{U}$  for first 40 cycle data to that for second 40 cycle data (counted reversely from the last cycle data to avoid the big change for the values of  $^{206}\text{Pb}/^{238}\text{U}$  occurring at beginning of first several cycles )
